# Supplementary material
Source: Royal Society of Chemistry journal article supplement (doi:10.1039/d6cc02317g)
Supplement: d6cc02317g1.pdf [file d6cc02317g1.pdf]

## Supporting Information

### Real-time Investigating Two Conformational Changes of Adenosine Aptamer with Single Molecule Fingerprint Signals

Chunmeng Zhong<sup>a</sup>, Junjie Huang<sup>a</sup>, Shan Wang<sup>a</sup>, Jianyuan Dai<sup>a</sup>, and Cuisong Zhou<sup>a\*</sup>

<sup>a</sup> College of Chemistry, Sichuan University, Chengdu 610064, P. R. China

\*Email: [zcs@scu.edu.cn](mailto:zcs@scu.edu.cn)

#### EXPERIMENTAL SECTION

##### Materials and reagents

Lipid 1, 2-diphytanoyl-snglycero-3-phosphocholine (DPhPC) was purchased from Avanti Polar Lipids, Inc. (Alabaster, AL, U.S.A.). Wild-type  $\alpha$ -HL nanopore, Potassium chloride,  $\text{MgCl}_2 \cdot 5\text{H}_2\text{O}$ ,  $\text{CaCl}_2$ , and Trizma @hydrochloric acid were obtained from Sigma-Aldrich. Decane, goat serum, Adenosine, adenosine monophosphate (AMP), adenosine diphosphate (ADP) and Adenosine triphosphate (ATP) were purchased from Aladdin (Shanghai, China). A Teflon chamber with a 150  $\mu\text{m}$  orifice was purchased from Warner Instruments (Hamden, CT, USA). All the solutions used in the experiments were prepared using ultra-pure water (18.25  $\text{M}\Omega$ ). The DNA aptamers were synthesized and purified by Shanghai Sangon Biological Engineering Technology & Service Co. Ltd. (Shanghai, China). DNA sequences utilized in this work are as follows:

Ade1301:5'-ACGACGTTTGCATGAGAAACGTATGGTTTCGAAGGTCGTT<sub>15</sub>-3'.

AFB1 aptamer: 5'-CACGTGTTGTCTCTCTGTGTCTCGTGT<sub>15</sub>-3'

$\text{Cd}^{2+}$  aptamer: 5'-GACGACGGGTTACAGTCCGTTGTC-3'

OTA aptamer: 5'-GATCGGGTGTGGGTGGCGTAAAGGGAGCATCGGACA-3'

Random DNA: 5'- GCTGCGAGGTAAAGG-3'

The experiments were performed using buffer with 1.0 M KCl, 50 mM MgCl<sub>2</sub>, 10 mM Tris-HCl and 1mM EDTA (pH 7.5) at 25 °C. The final concentration of DNA was 200 nM. Before the combination experiment, Aps and DNA were incubated in the experimental buffer at 25°C for 60 minutes in advance, and then added to the cis chamber.

### **Nanopore Electrical Recording**

All experiments were conducted at  $25 \pm 2$  °C. 1 mL buffer were respectively added in cis chamber and trans chamber. 30 mg/mL Lipid 1, 2-diphytanoyl-snglycero-3-phosphocholine (DPhPC) was coated on both sides of orifice to form a phospholipid bilayer. 5 µg/mL  $\alpha$ -HL protein was added into the cis chamber while the voltage was increased to 200-300 mV in order to guide the  $\alpha$ -HL to self-assemble into heptameric transmembrane channels on the phospholipid bilayer. The DNA and molecule/aptamer complex moved from cis chamber to trans chamber under the guidance of voltage of +160 mV with Ag/AgCl electrodes. Event currents were recorded by nanopore recording system (EPC-10, HEKA Elektronik GmbH, Germany).

### **Data Analysis**

MATBLAB (R2011b, MathWorks) was employed to data processing for gaining dwell time  $\tau$ , the dwell time of different level  $t$  and current blockage  $I/I_0$ , where  $I$  was blocking current and  $I_0$  was opening current. All the data were imported into origin 2021 and plotted as statistical histograms. Gaussian fitting was performed on the histogram to obtain the mean value of  $\tau$ ,  $t$  and  $I/I_0$ . Each experiment will be independently repeated three times, and all the data are presented as mean  $\pm$  standard deviation ( $n=3$ ) to ensure the reproducibility of the data.

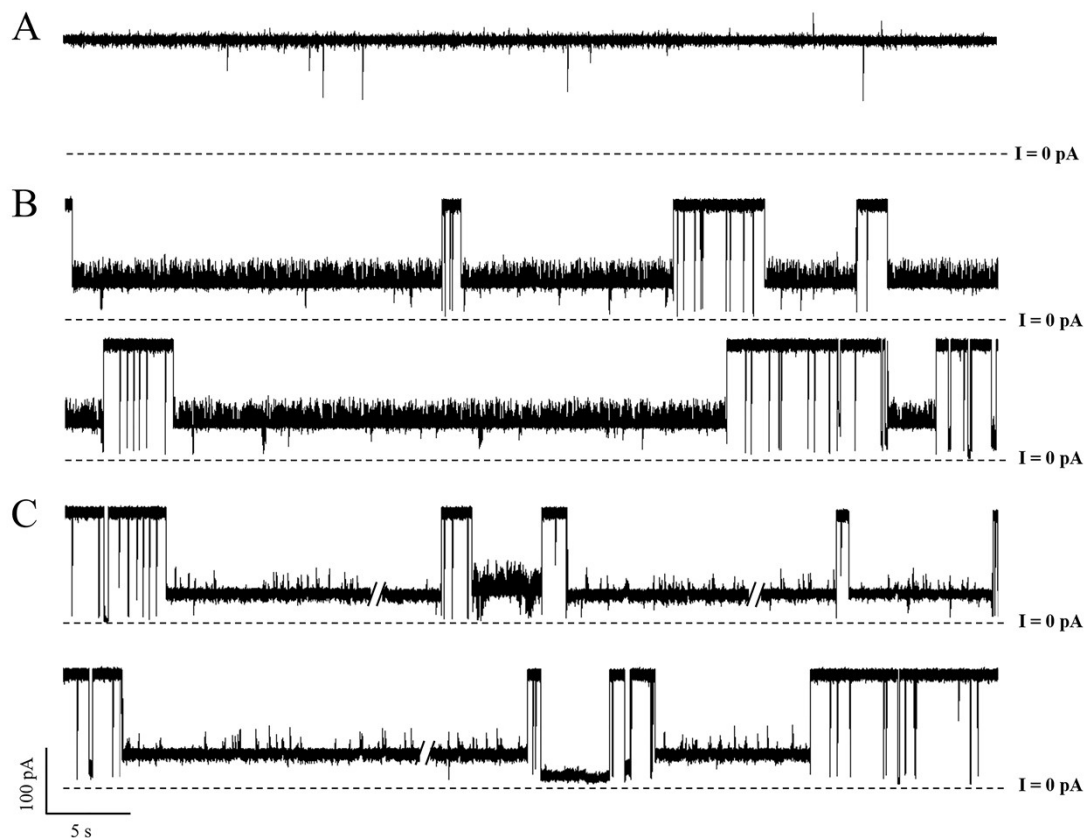

**Figure S1.** The current trace of Ade (A), Ade1301 (B) and Ade/Ade1301 complex (C). The concentrations of Ade and Ade1301 was 100  $\mu$ M and 200 nM, respectively. (n = 3)

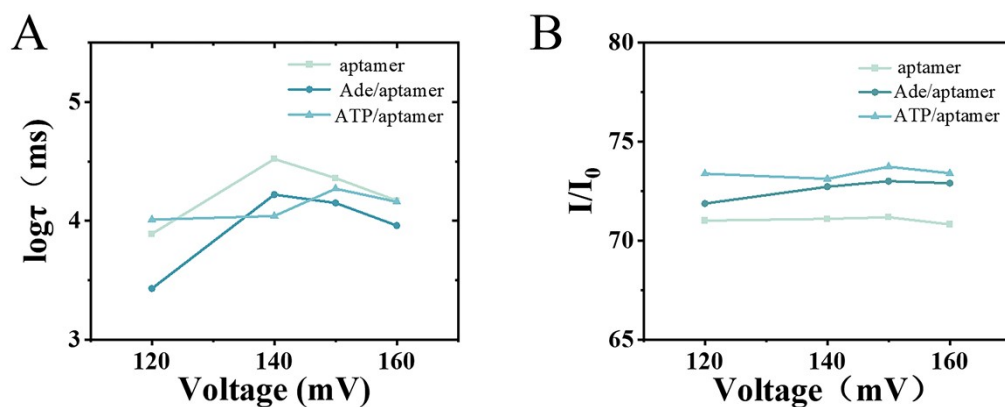

**Figure S2.** The  $\log\tau$  (A) and  $I/I_0$  (B) of Ade1301, Ade/Ade1301 complex and ATP/Ade1301 complex at different voltages. The concentrations of molecule and aptamer was 100  $\mu$ M and 200 nM, respectively. (n = 3)

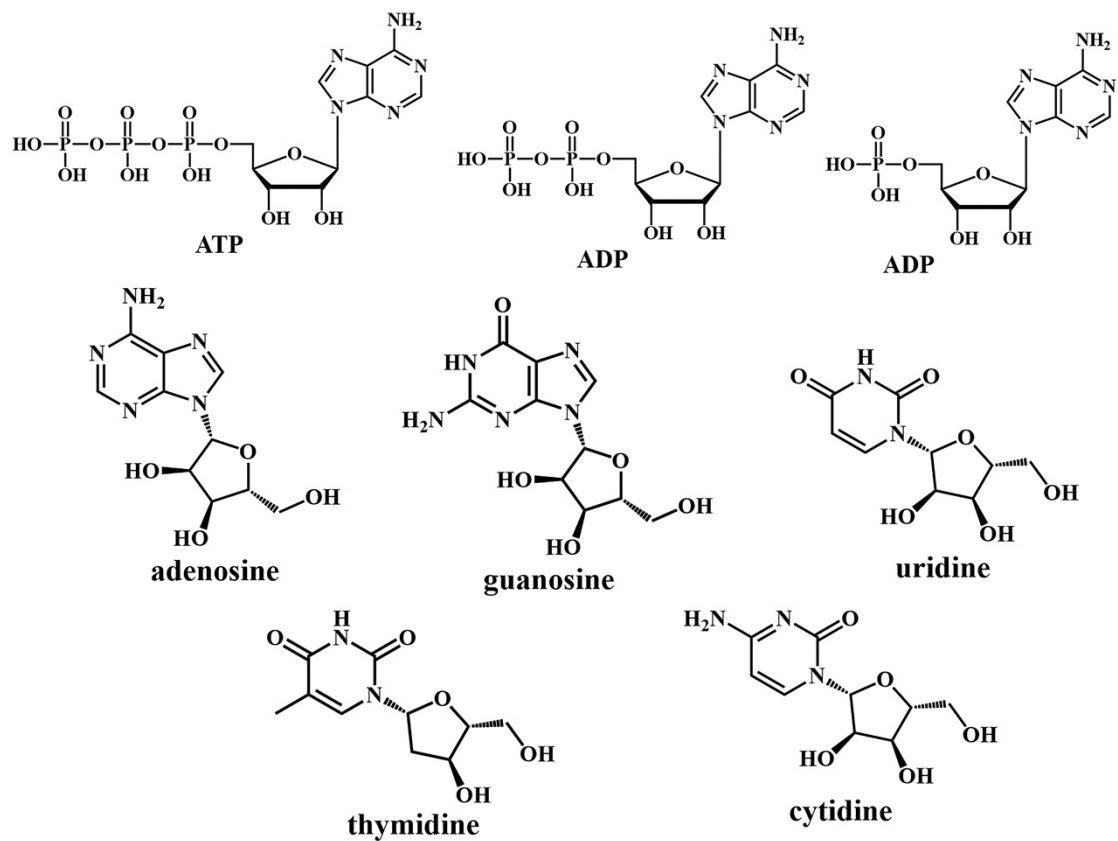

**Figure S3.** Chemical structural formulas of ATP, ADP, AMP, adenosine, guanosine, uridine, thymidine, cytidine.

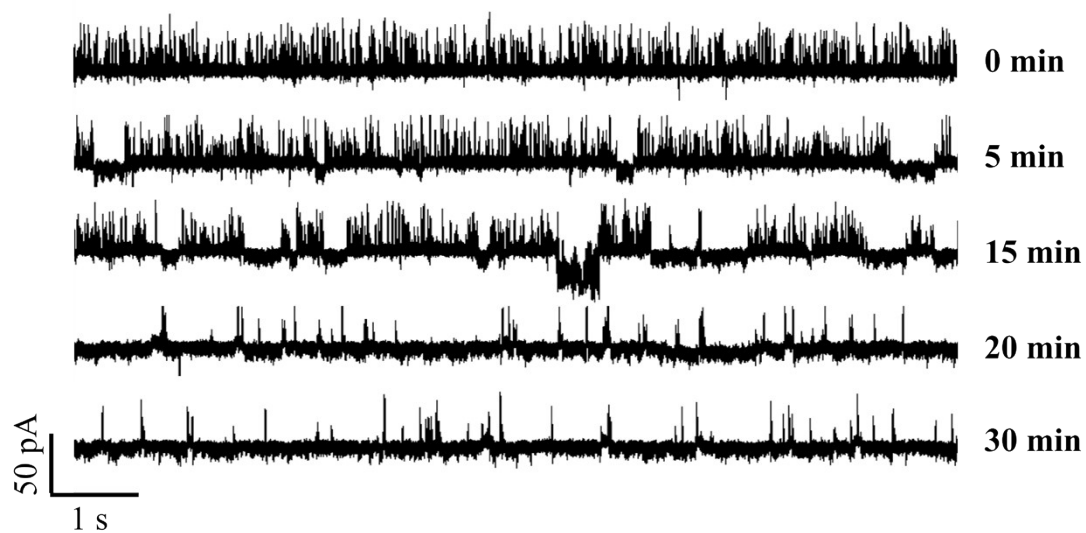

**Figure S4.** The current trace measured at 5, 10, 15, 20 and 30 min after the addition of adenosine.

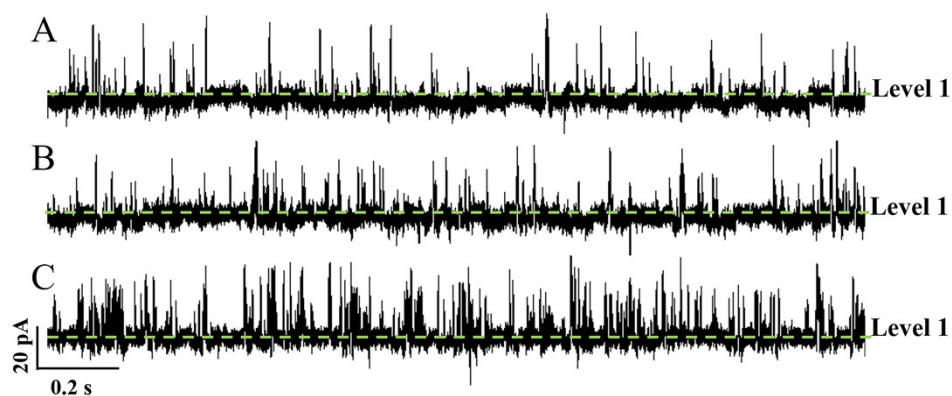

Figure S5. The current trace of (A) adenine/Ade1301 complex, (B) theophylline/Ade1301 complex and (C) theobromine/Ade1301 complex. The concentrations of molecules and Ade1301 were 100  $\mu\text{M}$  and 200 nM.

**Table S1.**  $\Delta I_2/I_0$ ,  $t_2$  and  $t_1$  of molecule/Ade1301 complexes with different affinities and concentrations. The final concentration of Ade1301 was 200 nM. Each experiment was repeated three times. (n =3)

|                      | 100 $\mu\text{M}$ AMP | 100 $\mu\text{M}$ ATP | 100 $\mu\text{M}$ Ade | 10 $\mu\text{M}$ Ade | 1 $\mu\text{M}$ Ade |
|----------------------|-----------------------|-----------------------|-----------------------|----------------------|---------------------|
| $\Delta I_2/I_0$ (%) | $6.56 \pm 0.16$       | $11.34 \pm 0.07$      | $6.48 \pm 0.06$       | $6.36 \pm 0.07$      | $6.48 \pm 0.08$     |
| $t_2(\text{ms})$     | $74 \pm 11$           | $534 \pm 97$          | $280 \pm 60$          | $196 \pm 40$         | $198 \pm 28$        |
| $t_1(\text{ms})$     | $117 \pm 27$          | $278 \pm 26$          | $15 \pm 4$            | $121 \pm 18$         | $1323 \pm 246$      |

**Table S2.**  $T_2$  and  $t_1$  of Ade/Ade1301 complexes under different annealing conditions. The concentrations of molecule and Ade1301 was 10  $\mu\text{M}$  and 200 nM, respectively. Each experiment was repeated three times. (n =3)

|                  | Aptamer annealing | Aptamer and Ade annealing |
|------------------|-------------------|---------------------------|
| $t_2(\text{ms})$ | $196 \pm 40$      | $270 \pm 21$              |
| $t_1(\text{ms})$ | $121 \pm 18$      | $142 \pm 29$              |

**Table S3.**  $\Delta I_2/I_0$ ,  $t_2$  and  $t_1$  of Ade/Ade1301 complexes at different pH. The concentrations of Ade and Ade1301 was 100  $\mu\text{M}$  and 200 nM, respectively. Each experiment was repeated three times. (n

=3)

|            | <b>pH</b>            | <b>6.0</b>  | <b>7.5</b>  | <b>9.0</b>  |
|------------|----------------------|-------------|-------------|-------------|
|            | $\Delta I_2/I_0$ (%) | 6.22 ± 0.05 | 6.48 ± 0.06 | 6.47 ± 0.02 |
| <b>Ade</b> | <b>t2 (ms)</b>       | 587 ± 65    | 280 ± 60    | 274 ± 28    |
|            | <b>t1 (ms)</b>       | 8 ± 2       | 15 ± 4      | 18 ± 5      |

**Table S4.**  $\Delta I_2/I_0$ , logt2 and logt1 of Ade/aptamer, AMP/aptamer, ADP/aptamer and ATP/aptamer. The final concentrations of molecule and Ade1301 were 100  $\mu$ M and 200 nM. Each experiment was repeated three times. (n =3)

|                      | Ade/aptamer | AMP/aptamer | ADP/aptamer | ATP/aptamer  |
|----------------------|-------------|-------------|-------------|--------------|
| $\Delta I_2/I_0$ (%) | 6.48 ± 0.06 | 6.56 ± 0.16 | 8.04 ± 0.12 | 11.35 ± 0.04 |
| logt2(ms)            | 2.44 ± 0.10 | 1.87 ± 0.07 | 2.03 ± 0.04 | 2.72 ± 0.08  |
| logt1(ms)            | 1.15 ± 0.12 | 2.06 ± 0.10 | 2.05 ± 0.05 | 2.44 ± 0.04  |

**Table S5.** Adenosine detection in mixtures sample of Adenosine Phosphate. The molecule concentration of adenosine phosphate was 10 nM. Each experiment was repeated three times. (n =3)

|                  | Recovery | RSD    |
|------------------|----------|--------|
| 100.00 nM Ade    | 102.97%  | 12.40% |
| 1.00 $\mu$ M Ade | 98.13%   | 6.93%  |

**Table S6.** Comparison of sensors sensitivity and linear range for the detection of adenosine.

| <b>Method of detection</b>             | <b>LOD</b>    | <b>Linear range</b>          | <b>Reference</b> |
|----------------------------------------|---------------|------------------------------|------------------|
| <b>Bragg diffraction</b>               | 13.50 $\mu$ M | 20.00 mM - 2.00 mM           | 1                |
| <b>Fluorescence</b>                    | 84.00 nM      | 0.50 $\mu$ M - 20.00 $\mu$ M | 2                |
| <b>LC-UV</b>                           | 1.25 $\mu$ M  | 1.25 $\mu$ M - 50.00 $\mu$ M | 3                |
| <b>electrochemistry</b>                | 1.25 nM       | 10.00 nM - 10.00 $\mu$ M     | 4                |
| <b>Colorimetry</b>                     | 18.00 nM      | 100.00 nM – 100.00 $\mu$ M   | 5                |
| <b><math>\alpha</math>-HL nanopore</b> | 10.50 nM      | 20.00 nM – 500.00 nM         | 6                |
| <b><math>\alpha</math>-HL nanopore</b> | 1.75 nM       | 10.00 nM – 10.00 $\mu$ M     | this work        |

**Table S7.** Detection results of Ade in 10% serum. The final concentration of Ade1301 was 200 nM.

Each experiment was repeated three times. (n =3)

| <b>Sample</b> | <b>Add</b> | <b>Found</b> | <b>Recovery (%)</b> | <b>RSD (%)</b> |
|---------------|------------|--------------|---------------------|----------------|
| <b>Serum</b>  | 20.00 nM   | 18.45 nM     | 92.25               | 10.48          |
|               | 100.00 nM  | 102.78 nM    | 102.78              | 12.22          |
|               | 2000.00 nM | 2003.03 nM   | 100.15              | 1.58           |

1. K. Jang, J. H. Westbay and S. A. Asher, *ACS Sensors*, 2022, 7, 1648-1656.
2. X. Xu, H. Wei and W. Jiang, *Analyst*, 2017, 142, 2247-2252.
3. A. Andries, S. De Rechter, P. Janssens, D. Mekahli and A. Van Schepdael, *Journal of Chromatography B*, 2018, 1096, 201-207.
4. Z. Gong, H. Zhao, Y. Mao, F. Zhou, Z. Shi and M. Lan, *Bioelectrochemistry*, 2025, 163, 108906.
5. R. Zhu, J. Song, Y. Zhou, P. Lei, Z. Li, H.-W. Li, S. Shuang and C. Dong, *Talanta*, 2019, 204, 294-303.
6. R. Cui, L. Li, L. Liu, Z. Li, Z. Wang, X. Liu, L. Tian, F. Yao, X. Kang and Y. Guo, *Microchemical Journal*, 2024, 207, 112020.
